# Supplementary material for: A novel mutation in the STK11 gene causes heritable Peutz-Jeghers syndrome - a case report
Source: BMC Med Genet. 2017 Feb 23;18:19. doi: 10.1186/s12881-017-0373-z (PMC5324205; doi:10.1186/s12881-017-0373-z)
Supplement: Additional file 1: Table S1. — Sequences of the primers for PCR and sequencing of the STK11 gene. Table S2.. Sequences of the RT-PCR primers. (DOC 31 kb) [file 12881_2017_373_MOESM1_ESM.doc]

**A novel mutation in the *STK11* gene causes heritable Peutz-Jeghers syndrome - a case report**

Jing-Hui Chen1*, Jing-Jing Zheng2*, Qin Guo3*, Chao Liu2,4*, Bin Luo2, Shuang-Bo Tang2, Jian-Ding Cheng2, Er-Wen Huang2

1Department of Anesthesiology, Guangzhou Women and Children's Medical Center, Guangzhou Medical University, Guangzhou, Guangdong, China

2Faculty of Forensic Medicine, Zhongshan School of Medicine, Sun Yat-Sen University,Guangzhou, Guangdong, China

3Department of Obstetrics and Gynecology, the First Affiliated Hospital of Guangdong Medical University, Guangzhou, Guangdong, China

4Guangzhou Forensic Science Institute, Guangdong Provincial Key Laboratory of Forensic Genetics, Guangzhou, Guangdong, China

* These authors contributed equally to this work

Correspondence to Er-Wen Huang, No. 74 Zhongshan 2 Road, Guangzhou 510080, China, e-mail huangerw@mail.sysu.edu.cn; or to Jian-Ding Cheng, No. 74 Zhongshan 2 Road, Guangzhou 510080, China, e-mail chengjd@mail.sysu.edu.cn.

Table S1 Sequences of the primers for PCR and sequencing of the *STK11* gene

| Fragment | Forward primer | Reverse primer |
| --- | --- | --- |
| 5’UTR+Exon1 | 5'-GGACCGGACGCTGAGGGCACT-3' | 5'-CGGGTCCAGCTCAGGGTGTTAAGA-3' |
| Exon2 | 5'-TGTCCTAACTGTGTCCTCCA-3' | 5'-ATTGCCACAATGGCTGACTT-3' |
| Exon3 | 5'-GGGCGTGTCCTCGTGTCATCTGTG-3' | 5'-GCCGGCTGCACCCCAAAGTCT-3' |
| Exon4+5 | 5'-CCTAGCCTTTCCTCTGTCCT-3' | 5'-CACCATCTGCCGTATGAGTT-3' |
| Exon6 | 5'-GTGGAAGGTGGTGAAGACAG-3' | 5'-CACTCAGTCCTCTCAATGCC-3' |
| Exon7 | 5'-CCTTAGGAGCGTCCAGGTA-3' | 5'-CGCATGTCCTCACTCAGAC-3' |
| Exon8 | 5'-GACATGGCTGAGCTTCTGTG-3' | 5'-CTTTGGGGACGTGGGATTG-3' |
| Exon9 | 5'-GCAGCATTTCAGGCTGGATA-3' | 5'-GGTCACCATGACTGACTAGC-3' |
| 3’UTR | 5'-AGCCCATCCACCAGCGTCAGAG-3' | 5' CCGACCTCCGAGACCGTTTACC 3' |

Table S2 Sequences of the RT-PCR primers

| Gene | Forward primer | Reverse primer |
| --- | --- | --- |
| Normal *STK11* | 5'-GGCCGTCAAGATCCTCAAGAAG-3' | 5'-GGGCCTGGCACACTGGGAAA-3' |
| Affected *STK11* | 5'-GGCCGTCAAGATCCTCAAGAAG-3' | 5'-GGGCCTGGCACACTGGGAAG-3' |
| *ACTB* | 5'-GGACTTCGAGCAGGAGATGG-3' | 5'-GCACCGTGTTGGCGTAGAGG-3' |
